# Supplementary material for: Vegetable dietary fibres made with minimal processing improve health-related faecal parameters in a valid rat model
Source: Royal Society of Chemistry journal article supplement (doi:10.1039/c5fo01526j), 2016-01-01
Supplement: c5fo01526j1.pdf [file c5fo01526j1.pdf]

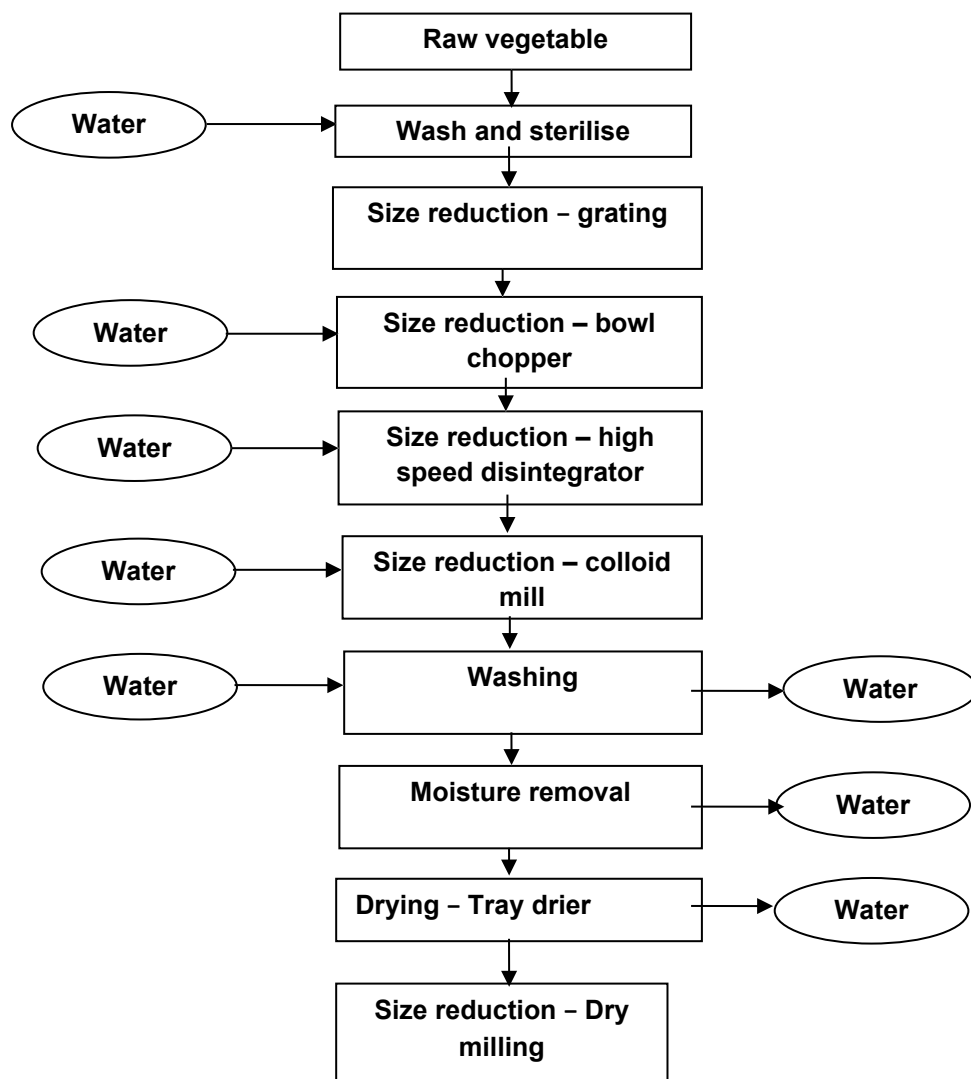

**Supplemental Figure S1** Process used to prepare minimally processed dietary fibres from vegetables.
